# Supplementary material for: Antimicrobial Activity of Sempervivum tectorum L. Extract on Pathogenic Bacteria Isolated from Otitis Externa of Dogs
Source: MDPI journal article supplement (doi:10.3390/vetsci10040265), 2023-03-29
Supplement: s1 [file s1]

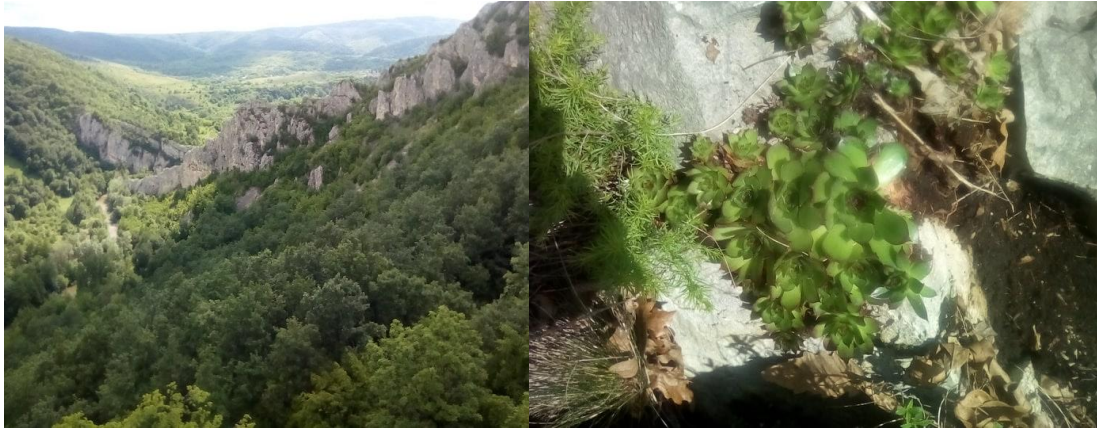

**Figure S1.** *Sempervivum tectorum* L. in the natural habitat (old fortress, Socolari/Ilidia - Ciclova Română, Caraș Severin County).

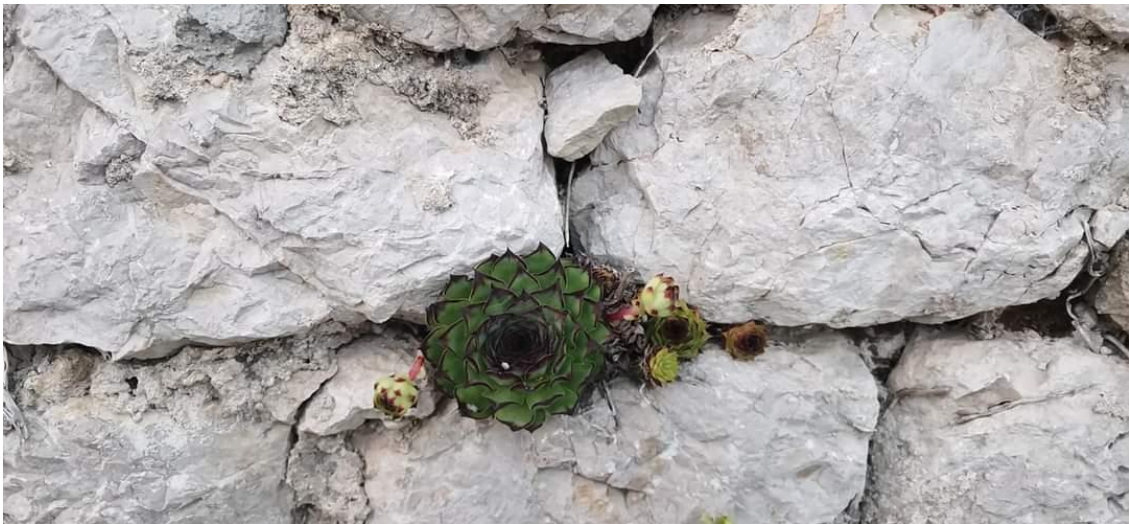

**Figure S2.** *Sempervivum tectorum* L. in the natural habitat.

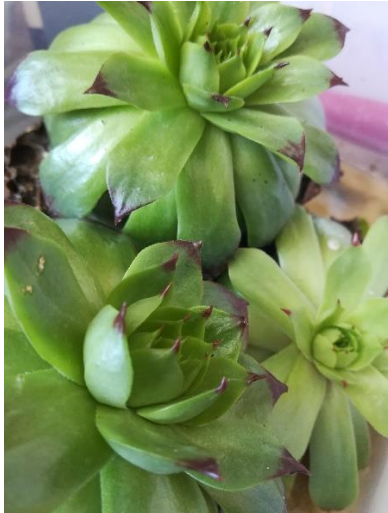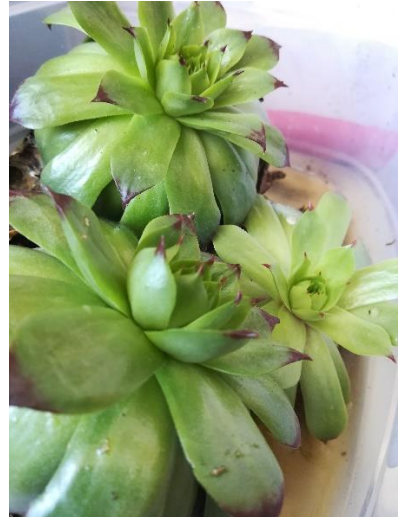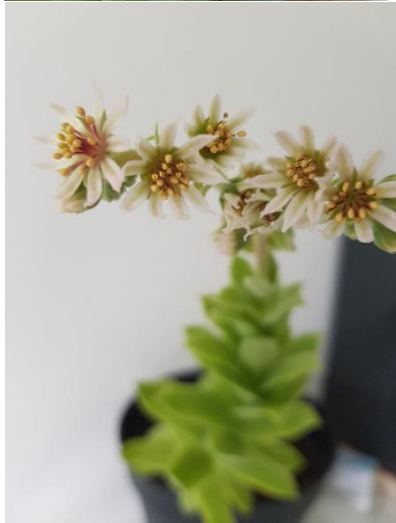

**Figure S3.** *Sempervivum tectorum* L. (*Sempervivum folium* and *Sempervivum flower*).

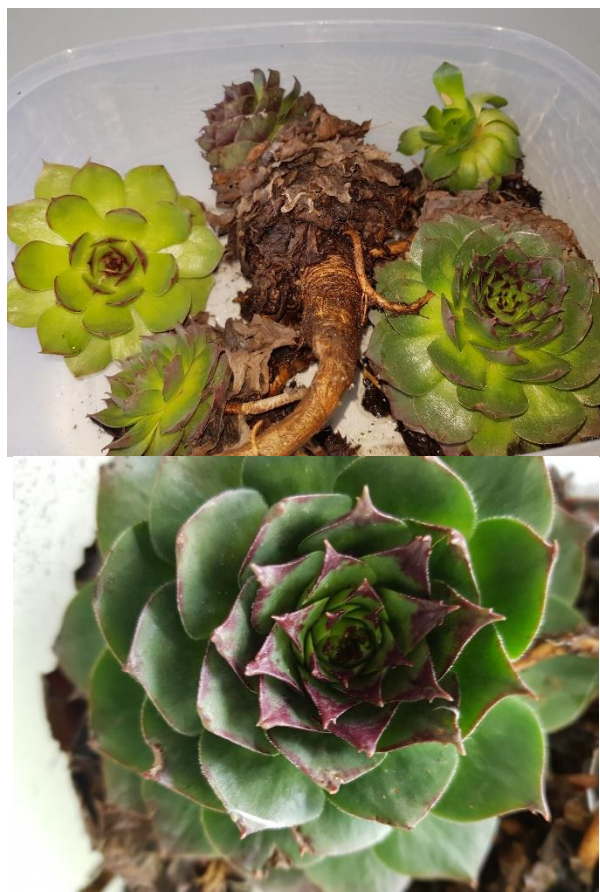

**Figure S4.** *Sempervivum tectorum* L. - preparation for processing in the laboratory.

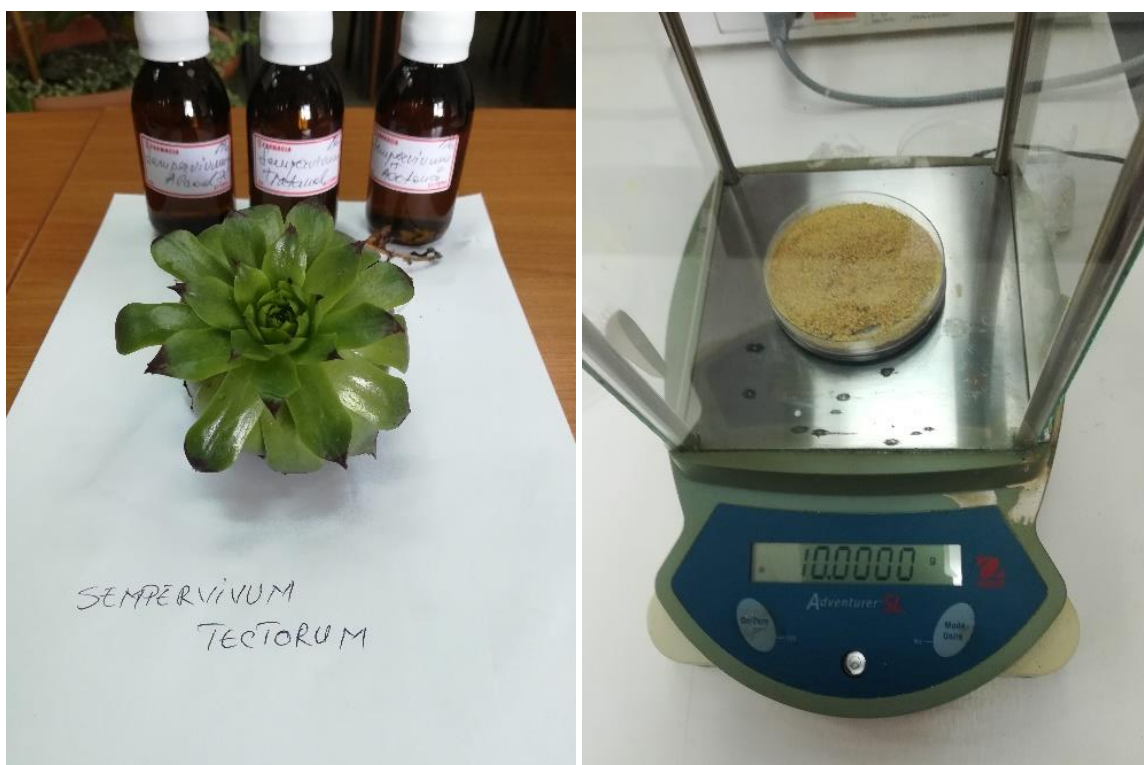

**Figure S5.** *Sempervivum tectorum* L., fresh leaf and lyophilized.



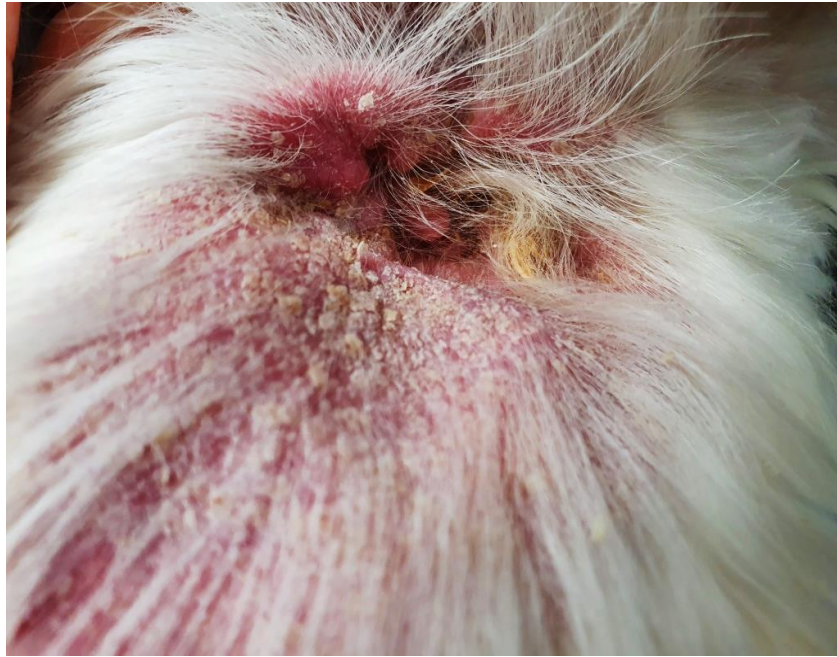

**Figure S6.** Erythematous ceruminous otitis externa in dog.

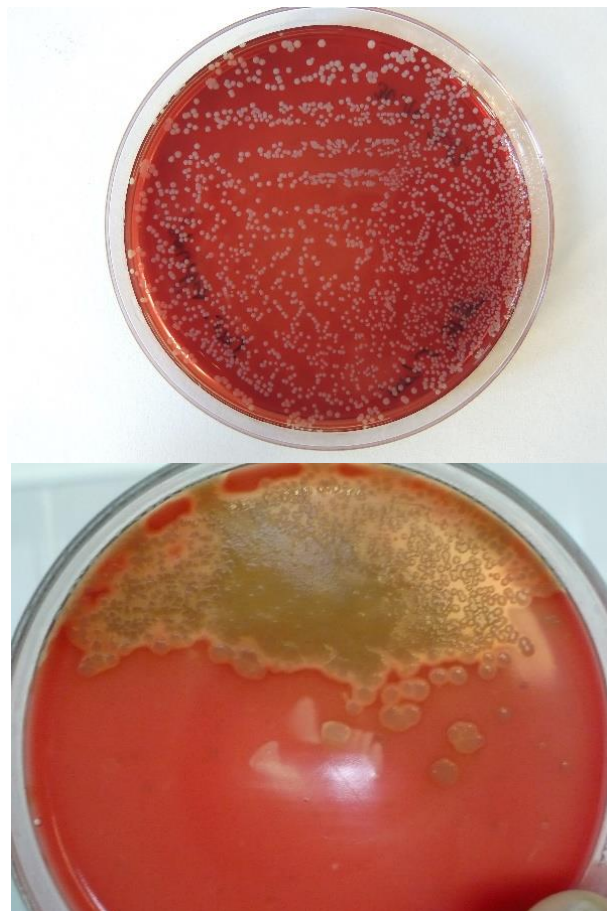

**Figure S7.** *Pseudomonas aeruginosa* (clinical strain).

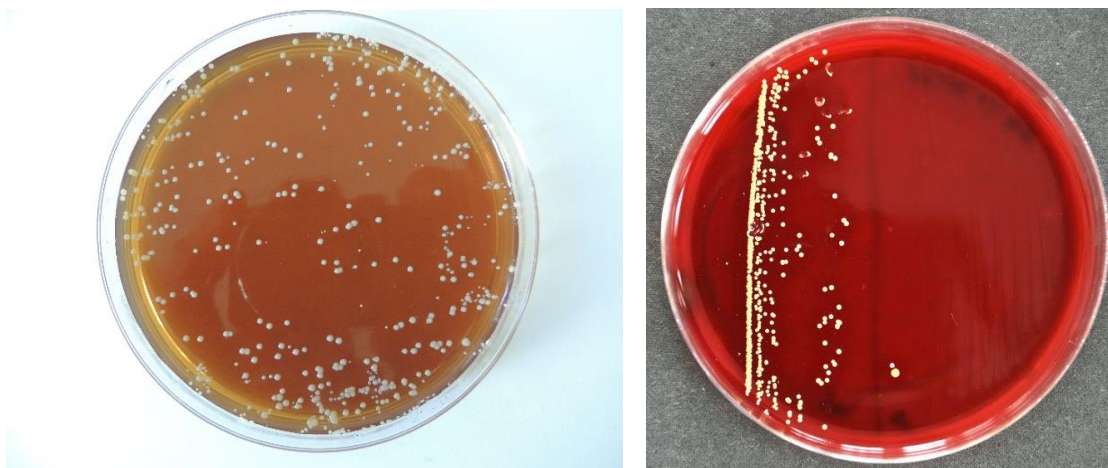

**Figure S8.** *Staphylococcus aureus* (clinical strain).

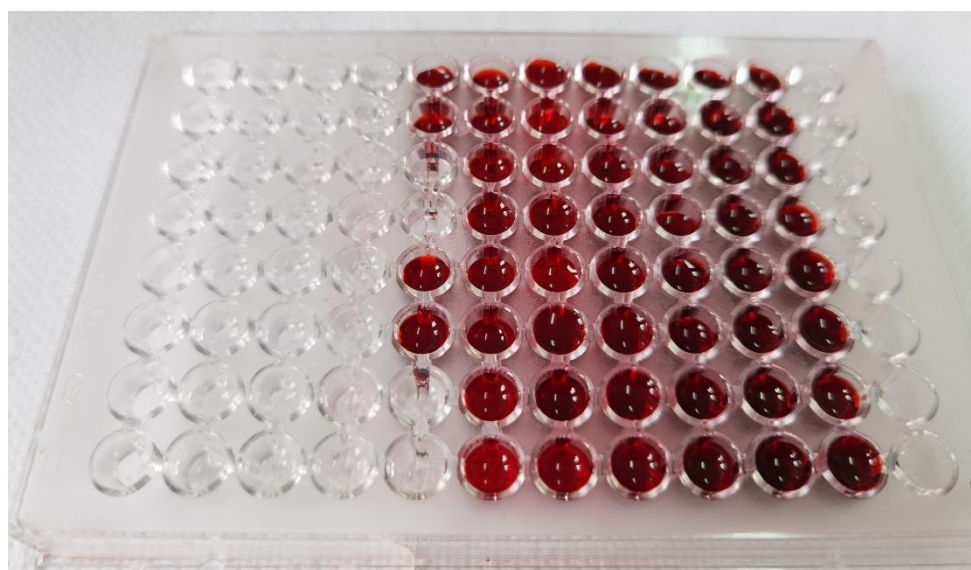

**Figure S9.** Microtiter plate with varying concentrations of *Sempervivum tectorum* L. extract and tested bacterial strains.

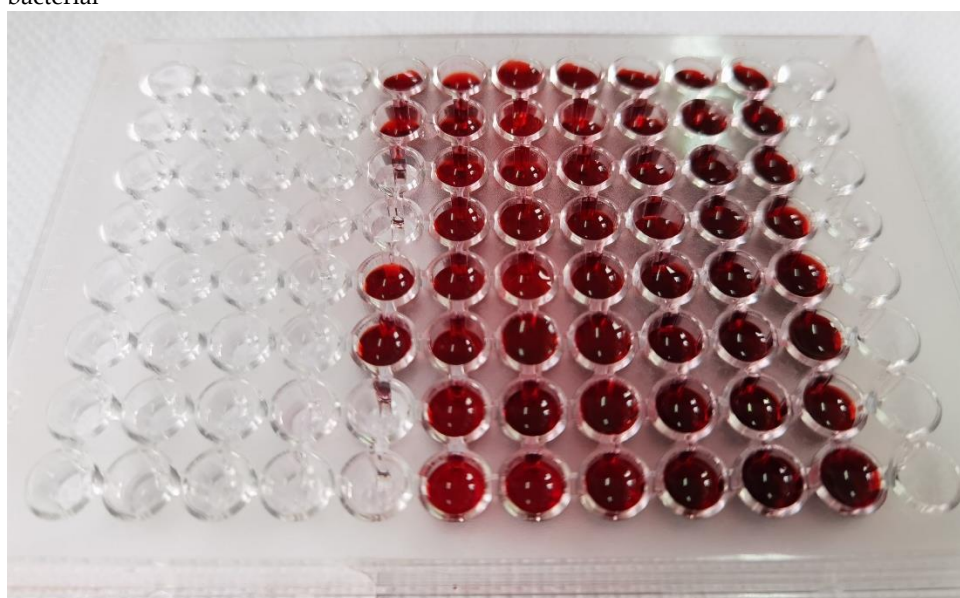

**Figure S10.** Microplate assay for determination of MIC /MBC of *Sempervivum tectorum* L. extract against clinical and standard bacterial strains (*P. aeruginosa* and *S. aureus*).



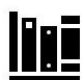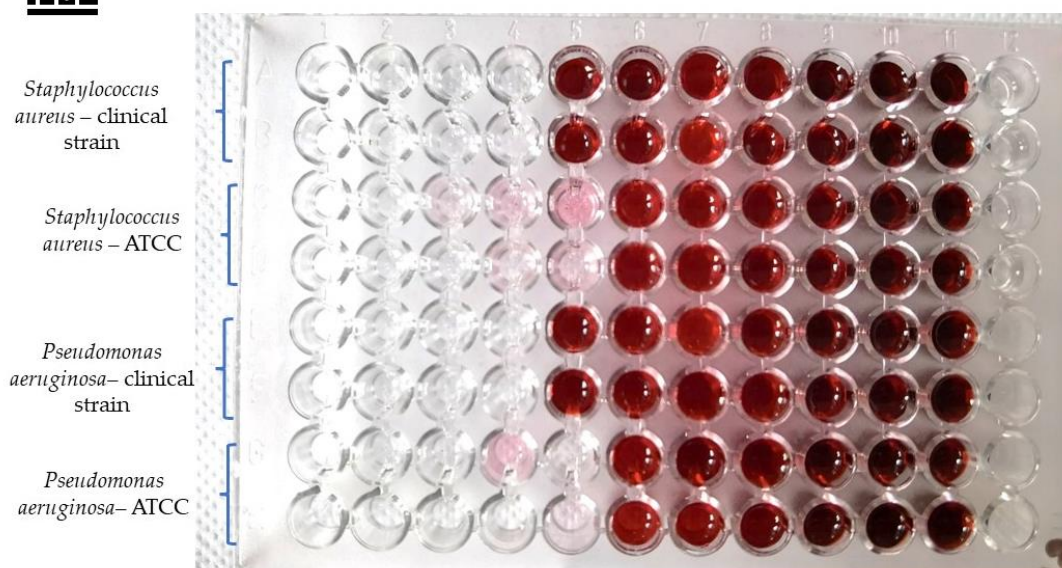

**Figure S11.** Determination of MIC and MBC , in a 96-well microtiter plate of ethanolic:water extracts of *Sempervivum tectorum* L. against *S. aureus* and *P. aeruginosa* (clinical and standard) strains.

**Table S1.** Total phenol and proanthocyanidin concentration of *S. tectorum* L. extract.

| Type of extract                                             | Proanthocyanidin contents<br>(mg PAC/g of extract) | Total phenol contents<br>(mg GA/g of extract) |
|-------------------------------------------------------------|----------------------------------------------------|-----------------------------------------------|
| Ethanolic extract 50% EtOH + 50% H <sub>2</sub> O<br>(leaf) | 15.39±0.667<br>(14.83/15.22/16.13)                 | 126.17±0.334<br>(125.89/126.08/126.54)        |

The numbers in parentheses represent the values of the three analyses.

**Table S2.** The median minimal inhibitory (MIC) and minimal bactericidal (MBC) concentrations activity of *S. tectorum* L. extracts (µg/ml).

| Bacterial strains                       | Ethanolic extract 50% EtOH + 50% H <sub>2</sub> O (leaf) - µg/ml |       |               | Enrofloxacin<br>(ENR/5µg) | Gentamycin<br>(GM/10µg) |
|-----------------------------------------|------------------------------------------------------------------|-------|---------------|---------------------------|-------------------------|
|                                         | MIC                                                              | MBC   | MBC/MIC ratio | MIC                       | MIC                     |
| <i>S. aureus</i> – clinical isolate     | 23.25                                                            | 37.23 | 1.60          | 0.5                       | 12.5                    |
| <i>S. aureus</i> ATCC 25923             | 20.33                                                            | 37.29 | 1.83          | 0.25                      | 1.125                   |
| <i>P. aeruginosa</i> – clinical isolate | 24.234                                                           | 37.30 | 1.53          | 0.5                       | 6.25                    |
| <i>P. aeruginosa</i> ATCC 27853         | 20.53                                                            | 37.02 | 1.80          | 0.125                     | 2.5                     |

CLSI, 2020: *P. aeruginosa* breakpoints (µg/ml): enrofloxacin (susceptible - ≤0,5; intermediate - 1-2; resistant ≥4); gentamicin (susceptible - ≤4; intermediate - 4; resistant ≥8); *S. aureus* breakpoints (µg/ml): enrofloxacin (susceptible - ≤0,5; intermediate - 1-2; resistant ≥4); gentamicin (susceptible - ≤4; intermediate - 4; resistant ≥8)

**Table S3.** The minimum inhibitory concentrations of the most effective plant extract against *S. aureus* and *P. aeruginosa* (clinical and standard) strains.

| Plant extract                                                                | Concentrations of extract (µg/ml) | <i>S. aureus</i> – clinical isolate |                                  | <i>S. aureus</i> ATCC 25923      |                                 | <i>P. aeruginosa</i> – clinical isolate |                                  | <i>P. aeruginosa</i> ATCC 27853    |                                  |
|------------------------------------------------------------------------------|-----------------------------------|-------------------------------------|----------------------------------|----------------------------------|---------------------------------|-----------------------------------------|----------------------------------|------------------------------------|----------------------------------|
|                                                                              |                                   | MIC (µg/ml)                         | MBC (µg/ml)                      | MIC (µg/ml)                      | MBC (µg/ml)                     | MIC (µg/ml)                             | MBC (µg/ml)                      | MIC (µg/ml)                        | MBC (µg/ml)                      |
| <b>S. tectorum L. ethanolic extract 50% EtOH + 50% H<sub>2</sub>O (leaf)</b> | 0.5                               | 0                                   | 0                                | 0                                | 0                               | 0                                       | 0                                | 0                                  | 0                                |
|                                                                              | 1.0                               | 0                                   | 0                                | 0                                | 0                               | 0                                       | 0                                | 0                                  | 0                                |
|                                                                              | 2.0                               | 0                                   | 0                                | 1.47± 0.301<br>(1.15/1.5/1.75)   | 0                               | 0                                       | 0                                | 1.75± 0.25<br>(1.5/1.75/2)         | 0                                |
|                                                                              | 4.0                               | 3.67± 0.381<br>(3.75/3.25/4)        | 0                                | 3.53± 0.604<br>(2.85/3.75/4)     | 0                               | 3.58± 0.378<br>(3.15/3.75/3.85)         | 0                                | 3.66± 0.453<br>(3.15/3.85/4)       | 0                                |
|                                                                              | 8.0                               | 7.5± 0.661<br>(6.75/7.75/8)         | 0                                | 7.11± 0.808<br>(6.25/7.25/7.85)  | 0                               | 7.7± 0.396<br>(7.25/7.85/8)             | 0                                | 7.63± 0.436<br>(7.15/7.75/8)       | 0                                |
|                                                                              | 16.0                              | 14.45± 0.5<br>(14.75/15.25/15.75)   | 15.93± 0.076<br>(15.85/15.95/16) | 15.7± 0.396<br>(15.25/15.85/16)  | 15.98± 0.028<br>(16/15.95/16)   | 15.51± 0.475<br>(15.05/15.5/16)         | 15.96± 0.028<br>(15.95/15.95/16) | 15.53± 0.604<br>(14.85/15.75/16)   | 15.75± 0.433<br>(16/15.25/16)    |
|                                                                              | 32.0                              | 30.05± 1.664<br>(28.15/30.75/31.25) | 31.9± 0.132<br>(31.75/31.95/32)  | 30.83± 1.808<br>(28.75/31.75/32) | 31.94± 0.060<br>(32/31.95/31.8) | 30.95± 0.818<br>(30.25/30.75/31.8)      | 31.96± 0.028<br>(32/31.95/31.9)  | 30.86± 1.125<br>(29.75/30.85/31.5) | 31.58± 0.381<br>(32/31.25/31.5)  |
|                                                                              | 64.0                              | 63.67± 0.381<br>(63.25/63.75/64)    | 63.86± 0.132<br>(63.75/63.85/64) | 63.36± 0.583<br>(62.85/63.25/64) | 63.95± 0.028<br>(63.85/64/64)   | 63.43± 0.419<br>(63.05/63.25/64)        | 64± 0.00<br>(64)                 | 63.75± 0.25<br>(63.5/63.75/64)     | 63.73± 0.421<br>(64/63.96/63.25) |

The numbers in parentheses represent the values of the three analyses.

**Table S4.** Phenotypic Antimicrobial Resistance (AMR) profiles of *Staphylococcus aureus* clinical strain.

| Antimicrobial                       | Interpretive Categories and MIC clinical breakpoint ( $\mu\text{g/mL}$ )* |              |             | <i>Staphylococcus aureus</i> clinical strain |
|-------------------------------------|---------------------------------------------------------------------------|--------------|-------------|----------------------------------------------|
|                                     | Susceptible                                                               | Intermediate | Resistant   |                                              |
| Cefoxitin (FOX)                     | $\leq 4$                                                                  | -            | $\geq 8$    | R                                            |
| Benzylpenicillin (PCG)              | $\leq 0.12$                                                               | -            | $\geq 0.25$ | S                                            |
| Clindamycin (CLI)                   | $\leq 0.5$                                                                | 1-2          | $\geq 4$    | R                                            |
| Chloramphenicol (CHL)               | $\leq 8$                                                                  | 16           | $\geq 32$   | S                                            |
| Erythromycin (ERY)                  | $\leq 0.5$                                                                | 1-4          | $\geq 8$    | R                                            |
| Enrofloxacin (ENR)                  | $\leq 1$                                                                  | 2            | $\geq 4$    | S                                            |
| Fusidic acid (FUS)                  | $\leq 1$                                                                  | 2            | $\geq 4$    | S                                            |
| Gentamicin (GM)                     | $\leq 4$                                                                  | 8            | $\geq 16$   | R                                            |
| Marbofloxacin (MBX)                 | $\leq 1$                                                                  | 2            | $\geq 4$    | S                                            |
| Nitrofurantoin (FT)                 | $\leq 32$                                                                 | 64           | $\geq 128$  | S                                            |
| Oxacillin (OXA)                     | $\leq 2$                                                                  | -            | $\geq 4$    | R                                            |
| Rifampicin (RIF)                    | $\leq 1$                                                                  | 2            | $\geq 4$    | R                                            |
| Tetracycline (TE)                   | $\leq 4$                                                                  | 8            | $\geq 16$   | S                                            |
| Vancomycin (VAN)                    | $\leq 2$                                                                  | 4-8          | $\geq 16$   | R                                            |
| Trimethoprim/Sulfamethoxazole (SXT) | $\leq 2/38$                                                               | -            | $\geq 4/76$ | R                                            |

\*Clinical and Laboratory Standards Institute (CLSI). *Performance Standards for Antimicrobial Susceptibility Testing*. 28th ed. CLSI supplement M100, 2018.

**Table S5.** Phenotypic Antimicrobial Resistance (AMR) profiles of *Pseudomonas aeruginosa* clinical strain.

| Antimicrobial                       | Interpretive Categories and MIC clinical breakpoint ( $\mu\text{g/mL}$ )* |              |              | <i>Pseudomonas aeruginosa</i> clinical strain |
|-------------------------------------|---------------------------------------------------------------------------|--------------|--------------|-----------------------------------------------|
|                                     | Susceptible                                                               | Intermediate | Resistant    |                                               |
| Gentamicin (GM)                     | $\leq 4$                                                                  | 8            | $\geq 16$    | S                                             |
| Enrofloxacin (ENR)                  | $\leq 0.5$                                                                | 1            | $\geq 2$     | S                                             |
| Imipenem (IPM)                      | $\leq 2$                                                                  | 4            | $\geq 8$     | R                                             |
| Meropenem (MEM)                     | $\leq 2$                                                                  | 4            | $\geq 8$     | S                                             |
| Piperacillin-tazobactam (TZP)       | $\leq 16/4$                                                               | 32/4-64/4    | $\geq 128/4$ | R                                             |
| Ceftazidime (CAZ)                   | $\leq 8$                                                                  | 16           | $\geq 32$    | S                                             |
| Cefepime (FEP)                      | $\leq 0.5$                                                                | 1-2          | $\geq 4$     | S                                             |
| Aztreonam (ATM)                     | $\leq 8$                                                                  | 16           | $\geq 32$    | S                                             |
| Azithromycin (AZM)                  | $\leq 16$                                                                 | -            | $\geq 32$    | R                                             |
| Amikacin (AN)                       | $\leq 16$                                                                 | 32           | $\geq 64$    | S                                             |
| Tobramycin (TM)                     | $\leq 4$                                                                  | 8            | $\geq 16$    | R                                             |
| Polymyxin B (PB)                    | $\leq 2$                                                                  | 4            | $\geq 8$     | R                                             |
| Ciprofloxacin (CIP)                 | $\leq 0.5$                                                                | 1            | $\geq 2$     | S                                             |
| Doxycycline (DO)                    | $\leq 4$                                                                  | 8            | $\geq 16$    | R                                             |
| Trimethoprim/Sulfamethoxazole (SXT) | $\leq 2/38$                                                               | -            | $\geq 4/76$  | R                                             |

\*Clinical and Laboratory Standards Institute (CLSI). *Performance Standards for Antimicrobial Susceptibility Testing*. 28th ed. CLSI supplement M100, 2018.
